# Supplementary material
Source: ML conference proceedings conference paper supplement (https://proceedings.neurips.cc/paper_files/paper/2010/hash/faa9afea49ef2ff029a833cccc778fd0-Abstract.html)
Supplement: Supplementary file 1 [file faa9afea49ef2ff029a833cccc778fd0-Supplemental.zip]

## A Proof of Corollary 1

In order to prove the convergence rates, we relate our choice of  $P$  to a well-known quantity in spectral graph theory, specifically, the graph Laplacian [3]. Recall the definition of  $A$  as the symmetric adjacency matrix of the undirected graph  $G$ , the degree of node  $i$  as  $\delta_i = |N(i)| = \sum_{j=1}^n A_{ij}$ , and the diagonal matrix  $D = \text{diag}\{\delta_1, \dots, \delta_n\}$ . We assume that the graph is connected, so that  $\delta_i \geq 1$  for all  $i$  and  $D$  is invertible. The (normalized) graph Laplacian is given by  $\mathcal{L}(G) = I - D^{-1/2}AD^{-1/2}$ , a matrix which is always symmetric, positive semidefinite, and satisfies  $\mathcal{L}\mathbb{1} = 0$ . Therefore, when the graph is degree-regular ( $\delta_i = \delta$  for all  $i \in V$ ), the standard random walk with self loops on  $G$  given by the matrix  $P := I - \frac{\delta}{\delta+1}\mathcal{L}$  is doubly stochastic and is valid for our theory. For non-degree regular graphs, we make the minor modification as in (5) to obtain

$$P_n(G) := I - \frac{1}{\delta_{\max} + 1}(D - A) = I - \frac{1}{\delta_{\max} + 1}D^{1/2}\mathcal{L}D^{1/2}. \quad (16)$$

As noted earlier,  $P_n(G)$  is doubly stochastic, and if the graph is  $\delta$ -regular, then  $P_n(G)$  is simply  $(I + A)/(\delta + 1)$ . The remainder of the corollary is based on bounding the spectral gap of  $P_n(G)$ .

**Lemma 4.** *The matrix  $P$  satisfies  $\sigma_2(P_n(G)) \leq \max\left\{1 - \frac{\min_i \delta_i}{\delta_{\max} + 1}\lambda_{n-1}(\mathcal{L}), \frac{\delta_{\max}}{\delta_{\max} + 1}\lambda_1(\mathcal{L}) - 1\right\}$ .*

**Proof** By a theorem of Ostrowski on congruent matrices (cf. Theorem 4.5.9, [10]), we have

$$\lambda_k(D^{1/2}\mathcal{L}D^{1/2}) \in \left[\min_i \delta_i \lambda_k(\mathcal{L}), \max_i \delta_i \lambda_k(\mathcal{L})\right]. \quad (17)$$

Since  $\mathcal{L}\mathbb{1} = 0$ , we have  $\lambda_n(\mathcal{L}) = 0$ , and so it suffices to focus on  $\lambda_1(D^{1/2}\mathcal{L}D^{1/2})$  and  $\lambda_{n-1}(D^{1/2}\mathcal{L}D^{1/2})$ . From the definition (16), the eigenvalues of  $P$  are of the form  $1 - (\delta_{\max} + 1)^{-1}\lambda_k(D^{1/2}\mathcal{L}D^{1/2})$ . The bound (17) coupled with the fact that all the eigenvalues of  $\mathcal{L}$  are non-negative implies that  $\sigma_2(P) = \max_{k < n} \{1 - (\delta_{\max} + 1)^{-1}\lambda_k(D^{1/2}\mathcal{L}D^{1/2})\}$  is upper bounded by the larger of  $1 - \frac{\delta_{\min}}{\delta_{\max} + 1}\lambda_{n-1}(\mathcal{L})$  and  $\frac{\delta_{\max}}{\delta_{\max} + 1}\lambda_1(\mathcal{L}) - 1$ .  $\square$

Computing the upper bound in Lemma 4 requires controlling  $\lambda_{n-1}(\mathcal{L})$  and  $\lambda_1(\mathcal{L})$ . To circumvent this complication, we use the well-known idea of a lazy random walk [3, 14], in which we replace by  $P$  by  $\frac{1}{2}(I + P)$ . The resulting symmetric matrix has the same eigenstructure as  $P$ , moreover,

$$\sigma_2\left(\frac{1}{2}(I + P)\right) = \lambda_2\left(I - \frac{1}{2(\delta_{\max} + 1)}D^{1/2}\mathcal{L}D^{1/2}\right) \leq 1 - \frac{\delta_{\min}}{2(\delta_{\max} + 1)}\lambda_{n-1}(\mathcal{L}). \quad (18)$$

Consequently, it is sufficient to bound only  $\lambda_{n-1}(\mathcal{L})$ . The convergence rate implied by the lazy random walk through Theorem 2 is no worse than twice that of the original walk, which is insignificant for the analysis in this paper. The remainder of the proof involves exploiting results from spectral graph theory [3] in order to control the eigenvalues of the Laplacian.

**Cycles and paths:** Recall the regular  $k$ -connected cycle from Figure 1(a), constructed by placing the  $n$  nodes on a circle and connecting every node to  $k$  neighbors on the right and left. For this graph, the Laplacian  $\mathcal{L}$  is a circulant matrix with diagonal entries 1 and off-diagonal non-zero entries  $-1/2k$ . Using known results on circulant matrices [2, 6], we find that  $\lambda_{n-1}(\mathcal{L}) = \Theta\left(\frac{k^2}{n^2}\right)$  for  $k = o(n)$ . For the regular  $k$ -connected path, by computing Cheeger constants [3, Chapter 2] we find that if  $k \leq \sqrt{n}$ , then  $\lambda_{n-1}(\mathcal{L}) = \Theta(k^2/n^2)$ . Note also that for the  $k$ -connected path on  $n$  nodes,  $\min_i \delta_i = k$  and  $\delta_{\max} = 2k$ . Thus, we can combine the above with Lemma 4 to see that for regular  $k$ -connected paths or cycles with  $k \leq \sqrt{n}$ ,  $\sigma_2(P) = 1 - \Theta\left(\frac{k^2}{n^2}\right)$ . Substituting the bound into Theorem 2 yields the claim of Corollary 1(a).

**Regular grids:** Now consider the case of a  $\sqrt{n}$ -by- $\sqrt{n}$  grid, focusing in particular on regular  $k$ -connected grids, in which any node is joined to every node that is fewer than  $k$  horizontal or vertical edges away in an axis-aligned direction. In this case, we use results on Cartesian products of graphs [3, Section 2.6] to analyze the eigen-structure of the Laplacian. In particular, the  $\sqrt{n}$ -by- $\sqrt{n}$   $k$ -connected grid is simply the Cartesian product of two regular  $k$ -connected paths of  $\sqrt{n}$  nodes. The second smallest eigenvalue of a Cartesian product of graphs is half the minimum of second-smallest eigenvalues of the original graphs [3, Theorem 2.13]. Thus, based on the preceding discussion of  $k$ -connected cycles, we conclude that if  $k \leq n^{1/4}$ , then we have  $\lambda_{n-1}(\mathcal{L}) = \Theta(k^2/n)$ , and we use Lemma 4 and (18) to see that the result in Corollary 1(b) immediately follows.

**Random geometric graphs:** Using the proof of Lemma 10 from Boyd et al. [2], we see that for any  $\epsilon > 0$ , if  $r = \sqrt{\log^{1+\epsilon} n / (n\pi)}$ , then with probability at least  $1 - 2/n^{c-1}$ ,

$$\min_i \delta_i \geq \log^{1+\epsilon} n - \sqrt{2c} \log n \quad \text{and} \quad \max_i \delta_i \leq \log^{1+\epsilon} n + \sqrt{2c} \log n. \quad (19)$$

Thus, letting  $\mathcal{L}$  be the graph Laplacian of a random geometric graph, if we can bound  $\lambda_{n-1}(\mathcal{L})$ , (19) coupled with Lemma 4 will control the convergence rate of our algorithm.

Von Luxburg et al. [23] give concentration results on the second-smallest eigenvalue of a geometric graph. In particular, their Theorem 3 says that if  $r = \omega(\sqrt{\log n / n})$ , then with exceedingly high probability,  $\lambda_{n-1}(\mathcal{L}) = \Omega(r)$ . Using (19), we see that for  $r = (\log^{1+\epsilon} n / n)^{1/2}$ , the ratio  $\frac{\min_i \delta_i}{\max_i \delta_i} = \Theta(1)$  and  $\lambda_{n-1}(\mathcal{L}) = \Omega(\frac{\log^{1+\epsilon} n}{n})$  with high probability. Combining this with Lemma 4 and (18), we have  $\sigma_2(P) = 1 - \Omega(\frac{\log^{1+\epsilon} n}{n})$ , the desired result of Corollary 1(c).

**Expanders:** The constant spectral gap in expanders [3, Chapter 6] removes any penalty due to network communication (up to logarithmic factors) and hence yields Corollary 1(d).

## B Proof of Proposition 1

The proof is based on construction of a set of objective functions  $f_i$  that force convergence to be slow by using the second eigenvector of the communication matrix  $P$ . Recall that  $\mathbb{1} \in \mathbb{R}^n$  is the eigenvector of  $P$  corresponding to its largest eigenvalue (equal to 1). Let  $v \in \mathbb{R}^n$  be the eigenvector of  $P$  corresponding to its second singular value,  $\sigma_2(P)$ . By using the lazy random walk (see Sec. A and (18)), we may assume without loss of generality that  $\lambda_2(P) = \sigma_2(P)$ . Let  $w = \frac{v}{\|v\|_\infty}$  be a normalized version of the second eigenvector of  $P$ , and note that  $\sum_{i=1}^n w_i = 0$ . Without loss of generality, we assume that there is an index  $i$  for which  $w_i = -1$  (otherwise we can flip signs in what follows); by re-indexing as needed, we can assume that  $w_1 = -1$ . We set  $\mathcal{X} = [-1, 1] \subset \mathbb{R}$  and define the univariate functions  $f_i(x) := (c + w_i)x$ . The global problem is then to minimize

$$\frac{1}{n} \sum_{i=1}^n f_i(x) = \frac{1}{n} \sum_{i=1}^n (c + w_i)x = cx$$

for some constant  $c > 0$  to be chosen. Note that each  $f_i$  is  $c + 1$ -Lipschitz. By construction, we see immediately that  $x^* = -1$  is optimal for the global problem.

Consider the evolution of the  $\{z(t)\}_{t=0}^\infty \subset \mathbb{R}^n$ , as generated by the update (4). By construction, we have  $g_i(t) = c + w_i$  for all  $t$ . Defining the vector  $g = (c\mathbb{1} + w) \in \mathbb{R}^n$ , we recall that  $P\mathbb{1} = \mathbb{1}$  to see

$$\begin{aligned} z(t+1) &= Pz(t) - g = P^2z(t-1) - Pg - g = \dots = - \sum_{\tau=0}^t P^\tau g \\ &= - \sum_{\tau=0}^{t-1} P^\tau (w + c\mathbb{1}) = - \sum_{\tau=0}^{t-1} P^\tau w - ct\mathbb{1} = - \sum_{\tau=0}^{t-1} \sigma_2(P)^\tau w - ct\mathbb{1}. \end{aligned} \quad (20)$$

In order to establish a lower bound, it suffices to show that at least one node is far from the optimum after  $t$  steps, and we focus on node 1. Since  $w_1 = -1$ , the evolution (20) guarantees that

$$z_1(t+1) = \sum_{\tau=0}^{t-1} \sigma_2(P)^\tau - ct = \frac{1 - \sigma_2(P)^{t-1}}{1 - \sigma_2(P)} - ct. \quad (21)$$

Recalling that  $\psi(x) = \frac{1}{2}x^2$  for this scalar setting, we have

$$x_i(t+1) = \operatorname{argmin}_{x \in \mathcal{X}} \left\{ -z_i(t+1)x + \frac{1}{2\alpha(t)}x^2 \right\} = \operatorname{argmin}_{x \in \mathcal{X}} \left\{ (x - \alpha(t)z_i(t+1))^2 \right\}$$

Hence  $x_1(t)$  is the projection of  $\alpha(t)z_1(t+1)$  onto  $[-1, 1]$ , and unless  $z_1(t) < 0$  we have

$$f(x_1(t)) - f(-1) \geq c > 0.$$

If  $t$  is overly small, the relation (21) will guarantee that  $z_1(t) \geq 0$ , so that  $x_1(t)$  is far from the optimum. If we choose  $c \leq 1/3$ , then a little calculation with (21) shows that we require  $t = \Omega((1 - \sigma_2(P))^{-1})$  in order to drive  $z_1(t)$  below zero.
