# Supplementary material
Source: ML conference proceedings conference paper supplement (https://proceedings.neurips.cc/paper_files/paper/2010/hash/faa9afea49ef2ff029a833cccc778fd0-Abstract.html)
Supplement: Supplementary file 2 [file faa9afea49ef2ff029a833cccc778fd0-Supplemental.zip]

Archive with 1 entries (1 files):
- extra/NIPS2010_0423_extra.pdf
